# Supplementary material for: Solvated electron-induced synthesis of cyclodextrin-coated Pd nanoparticles: mechanistic, catalytic, and anticancer studies
Source: Royal Society of Chemistry journal article supplement (doi:10.1039/d2dt03219h), 2022-12-21
Supplement: d2dt03219h1.pdf [file d2dt03219h1.pdf]

## Solvated electron-induced synthesis of cyclodextrin-coated Pd nanoparticles: mechanistic, catalytic, and anticancer studies

A. Guleria<sup>a,g\*</sup>, J. Aishwarya<sup>b,g</sup>, A. Kunwar<sup>a,g</sup>, S. Neogy<sup>c</sup>, A. K. Debnath<sup>d</sup>,  
M. C. Rath<sup>a,g</sup>, S. Adhikari<sup>e,g</sup> and A. K. Tyagi<sup>f,g\*</sup>

<sup>a</sup>Radiation & Photochemistry Division, Bhabha Atomic Research Centre, Mumbai 400085, India

<sup>b</sup>ACTREC (TMC), Kharghar, Navi Mumbai, India

<sup>c</sup>Materials Science Division, Bhabha Atomic Research Centre, Mumbai 400085, India

<sup>d</sup>Technical Physics Division, Bhabha Atomic Research Centre, Mumbai 400085, India

<sup>e</sup>Scientific Information Resource Division, Bhabha Atomic Research Centre, Mumbai 400085, India

<sup>f</sup>Chemistry Division, Bhabha Atomic Research Centre, Mumbai 400085, India

<sup>g</sup>Homi Bhabha National Institute, Trombay, Mumbai 400094, India

### Supporting information

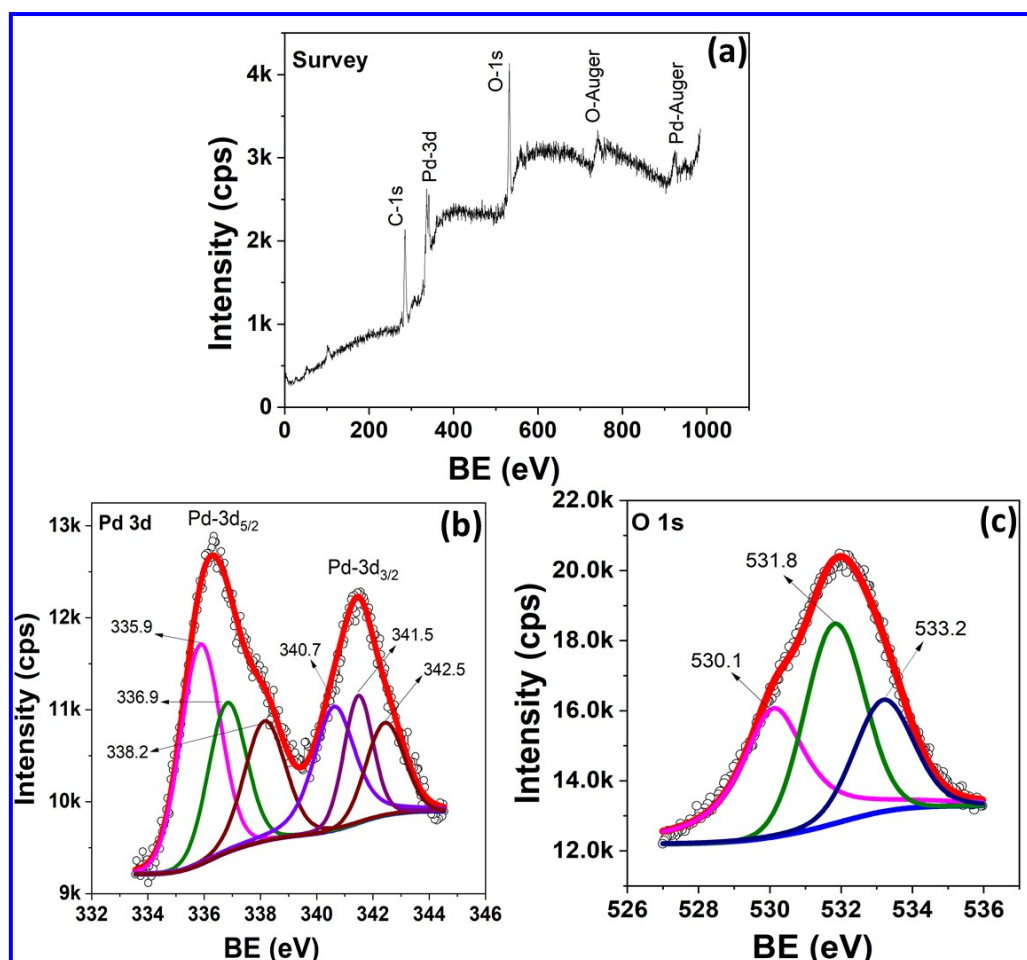

**Fig.S1.** (a) XPS survey spectrum of  $\gamma$ -ray@Pd NPs. (b) and (c) corresponds to the core-level XPS spectrum of Pd 3d and O 1s, respectively.

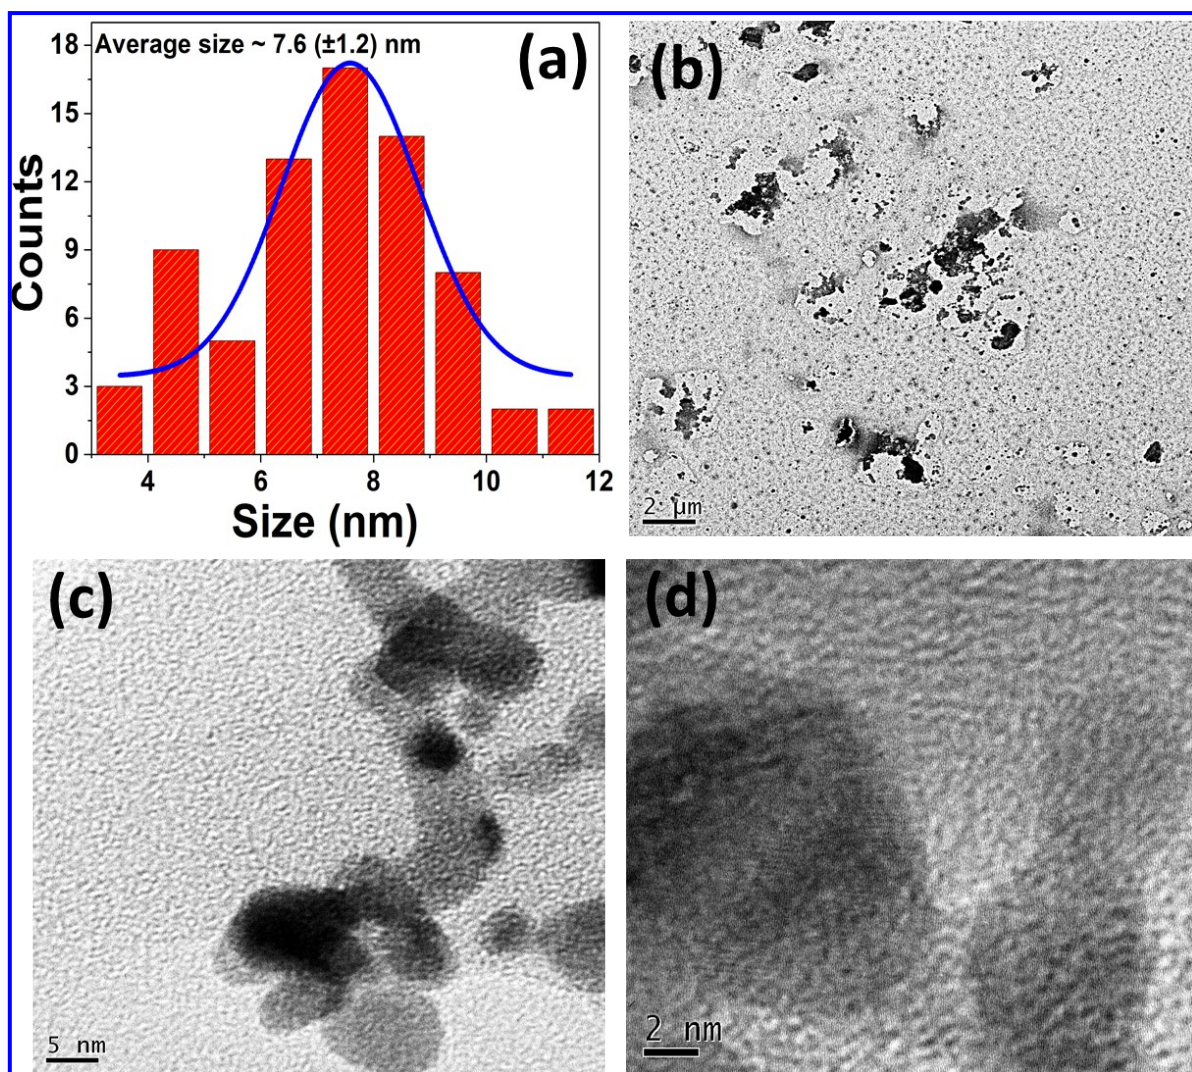

**Fig.S2.** (a) Particle size distribution plot and (b-d) HRTEM images of as-prepared  $\alpha$ -CD coated EB@Pd NPs at different magnification scales.

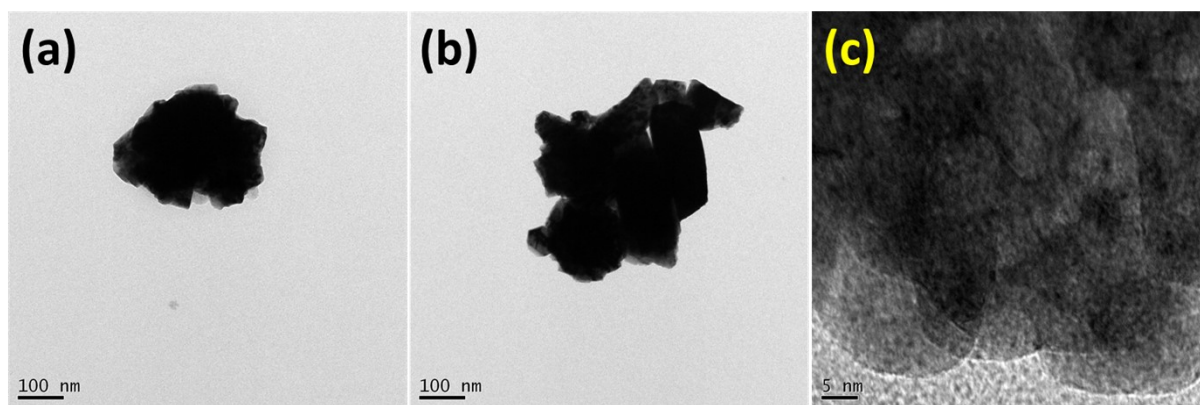

**Fig.S3.** HRTEM images of as-prepared  $\alpha$ -CD coated  $\gamma$ -ray@Pd NPs at different magnification scales.

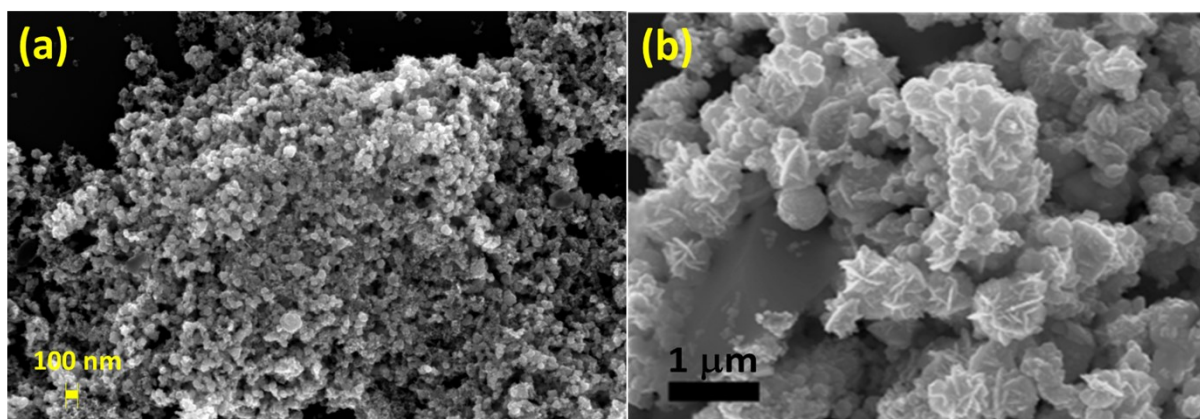

**Fig.S4.** FESEM images of  $\alpha$ -CD coated EB@Pd NPs (a) and  $\gamma$ -ray@Pd NPs (b).

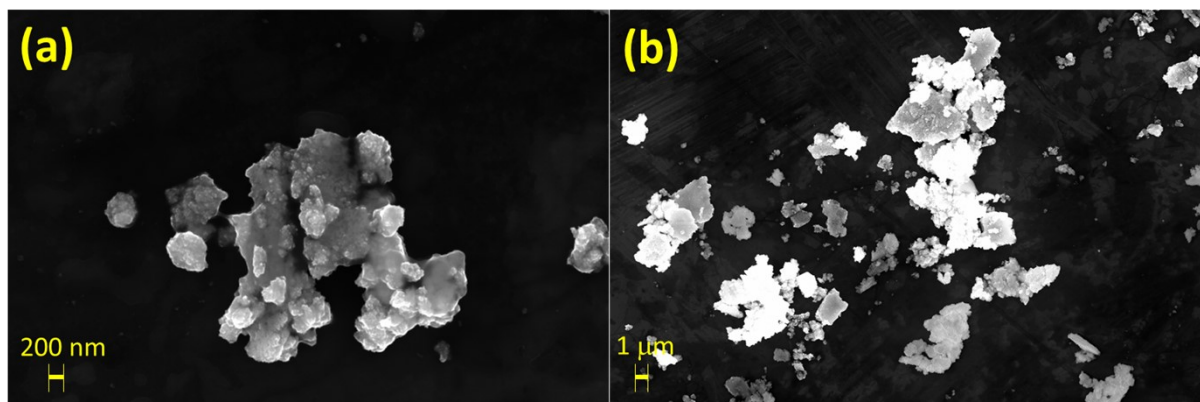

**Fig.S5.** FESEM images (a) & (b) of bare EB@Pd NPs at different magnification scales.

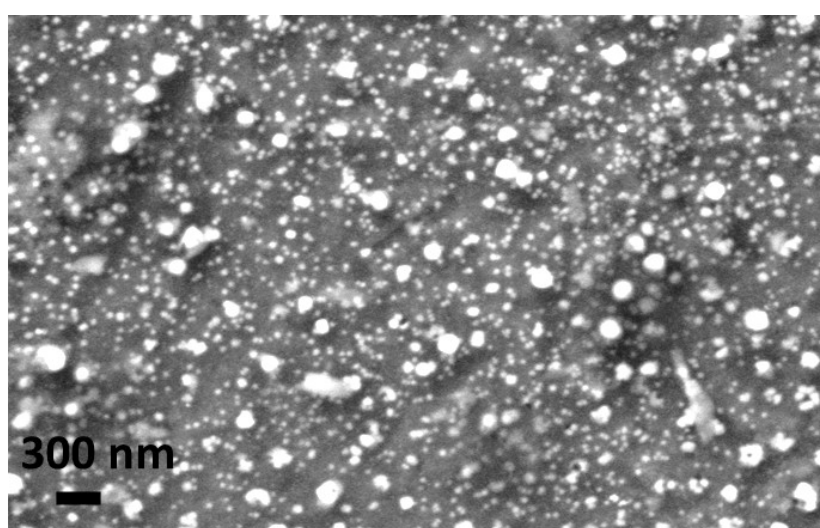

**Fig.S6.** FESEM image of PVA capped Pd NPs synthesised by  $\gamma$ -ray irradiation approach.
